# Supplementary material for: Crystallographic structure of wild-type SARS-CoV-2 main protease acyl-enzyme intermediate with physiological C-terminal autoprocessing site
Source: PubMed Central journal article supplement (PMC7674412; doi:10.1038/s41467-020-19662-4), 2020-11-18
Supplement: 41467_2020_19662_MOESM1_ESM.pdf [file 41467_2020_19662_MOESM1_ESM.pdf]

## SUPPLEMENTARY INFORMATION

### **Crystallographic structure of wild-type SARS-CoV-2 Main Protease acyl-enzyme intermediate with physiological C-terminal autoprocessing site**

Jaeyong Lee<sup>1,2,4</sup>, Liam J. Worrall<sup>1,4</sup>, Marija Vuckovic<sup>1</sup>, Federico I. Rosell<sup>1</sup>, Francesco Gentile<sup>3</sup>, Anh-Tien Ton<sup>3</sup>, Nathanael A. Caveney<sup>1</sup>, Fuqiang Ban<sup>3</sup>, Artem Cherkasov<sup>3</sup>, Mark Paetzel<sup>2,\*</sup> and Natalie C.J. Strynadka<sup>1,\*</sup>

<sup>1</sup>Department of Biochemistry and Molecular Biology and Centre for Blood Research, The University of British Columbia, Vancouver, British Columbia, Canada. <sup>2</sup>Department of Molecular Biology and Biochemistry, Simon Fraser University, Burnaby, British Columbia, Canada.

<sup>3</sup>Vancouver Prostate Centre, The University of British Columbia, Vancouver, British Columbia, Canada.

<sup>4</sup>These authors contributed equally to this work: Jaeyong Lee, Liam J. Worrall

\*E-mail: [mpaetzel@sfu.ca](mailto:mpaetzel@sfu.ca) (MP), [ncjs@mail.ubc.ca](mailto:ncjs@mail.ubc.ca) (NCJS).

Supplementary Information includes:

- Supplementary Tables 1 to 3
- Supplementary Figures 1 to 8

**Supplementary Table 1: Data collection and refinement statistics.**

|                                                     | Acyl-enzyme (WT)<br>PDB 7KHP     | Product (C145A)<br>PDB 7JOY      | Substrate-free (WT)<br>PDB 7JP1  |
|-----------------------------------------------------|----------------------------------|----------------------------------|----------------------------------|
| <b>Data collection</b>                              |                                  |                                  |                                  |
| Space group                                         | C 2                              | C 2                              | C 2                              |
| Cell dimensions                                     |                                  |                                  |                                  |
| <i>a</i> , <i>b</i> , <i>c</i> (Å)                  | 124.3, 80.2, 63.2                | 123.7, 80.3, 63.3                | 113.2, 52.7, 44.6                |
| $\alpha$ , $\beta$ , $\gamma$ (°)                   | 90, 89.6, 90                     | 90, 90.2, 90                     | 90, 102.7, 90                    |
| Resolution (Å)                                      | 29.69 - 1.95 (2.02 - 1.95)*,#    | 26.16 - 2.0 (2.07 - 2.0)#        | 27.2 - 1.8 (1.86 - 1.8)          |
| <i>R</i> <sub>sym</sub>                             | 0.0462 (1.597)                   | 0.1411 (0.885)                   | 0.102 (0.499)                    |
| <i>R</i> <sub>rim</sub>                             | 0.0293 (0.9888)                  | 0.0859 (0.777)                   | 0.066 (0.418)                    |
| CC1/2                                               | 0.999 (0.412)#                   | 0.98 (0.619)#                    | 0.997 (0.63)                     |
| <i>I</i> / $\sigma$ <i>I</i>                        | 12.30 (0.79)#                    | 7.71 (0.54)#                     | 10.5 (1.4)                       |
| Completeness (%)                                    | 99.48 (99.42)                    | 95.89 (92.56)                    | 96.0 (84.20)                     |
| Redundancy                                          | 3.4 (3.5)                        | 2.8 (1.8)                        | 3.2 (2.0)                        |
| <b>Refinement</b>                                   |                                  |                                  |                                  |
| Resolution (Å)                                      | 1.95                             | 2.0                              | 1.8                              |
| No. reflections                                     | 44912 (4467)                     | 40219 (3843)                     | 22979 (2015)                     |
| <i>R</i> <sub>work</sub> / <i>R</i> <sub>free</sub> | 0.199 / 0.240<br>(0.350 / 0.359) | 0.217 / 0.252<br>(0.320 / 0.327) | 0.186 / 0.219<br>(0.371 / 0.401) |
| <b>No. atoms</b>                                    |                                  |                                  |                                  |
| Protein                                             | 4731                             | 4729                             | 2361                             |
| Ligand/ion                                          | 12                               | 0                                | 0                                |
| Water                                               | 141                              | 268                              | 140                              |
| <b>B-factors</b>                                    |                                  |                                  |                                  |
| Protein                                             | 54.1                             | 34.1                             | 34.7                             |
| Ligand/ion                                          | 66.7                             |                                  |                                  |
| Water                                               | 50.1                             | 36.4                             | 49.7                             |
| <b>R.m.s. deviations</b>                            |                                  |                                  |                                  |
| Bond lengths (Å)                                    | 0.016                            | 0.011                            | 0.016                            |
| Bond angles (°)                                     | 2.03                             | 1.58                             | 1.99                             |

\*Values in parentheses are for highest-resolution shell.

# Acyl-enzyme (WT) and Product (C145A) diffraction exhibited anisotropy as assessed by the Diffraction Anisotropy Server. The maximum resolution limit was assessed based on *I* /  $\sigma$ *I* and CC1/2 in the reciprocal lattice directions.

**Supplementary Table 2: SAXS sample details, data collection parameters, software, structure parameters, and modelling statistics.**

|                                               | <b>WT M<sup>Pro</sup></b>                                              |         | <b>P9T M<sup>Pro</sup></b>     |         |
|-----------------------------------------------|------------------------------------------------------------------------|---------|--------------------------------|---------|
|                                               | SASBDB                                                                 | SASDJG5 | SASBDB                         | SASDJH5 |
| <b>Sample Details</b>                         |                                                                        |         |                                |         |
| Organism                                      |                                                                        |         | SARS-CoV-2                     |         |
| Protein                                       | M <sup>Pro</sup>                                                       |         | M <sup>Pro</sup> (P9T)         |         |
| Monomer M from chemical composition (Da)      | 33,797                                                                 |         | 33,801                         |         |
| Concentrations (mg/mL)                        | 1.20, 2.41, 4.82, 9.63                                                 |         | 1.53, 3.06, 6.12, 12.25, 24.49 |         |
| Solvent                                       | 50 mM Tris pH 7.4, 1 mM DTT, 1 mM EDTA                                 |         |                                |         |
| <b>Data Collection Parameters</b>             |                                                                        |         |                                |         |
| Instrument                                    | Rigaku BioSAXS-2000                                                    |         |                                |         |
| Wavelength (Å)                                | 1.54                                                                   |         |                                |         |
| Beam Size (mm)                                | 1.5                                                                    |         |                                |         |
| Detector                                      | Rigaku HyPix-3000 (pixel size: 100 µm, active area: 77.5 mm X 30.5 mm) |         |                                |         |
| <i>q</i> measurement range (Å <sup>-1</sup> ) | 0.006 - 0.650                                                          |         |                                |         |
| Radiation damage monitoring                   | Manual examination of each frame                                       |         |                                |         |
| Exposure time (s)                             | 3,600 (12 x 300)                                                       |         |                                |         |
| Sample temperature (°C)                       | 6                                                                      |         |                                |         |
| <b>Software</b>                               |                                                                        |         |                                |         |
| SAXS data reduction                           | SAXSLab                                                                |         |                                |         |
| Data processing                               | ATSAS                                                                  |         |                                |         |
| <b>Structural Parameters</b>                  |                                                                        |         |                                |         |
| <i>q</i> range (Å <sup>-1</sup> )             | 0.0124-0.604                                                           |         | 0.0124-0.604                   |         |
| Guinier analysis                              |                                                                        |         |                                |         |
| <i>I</i> (0) (cm <sup>-1</sup> )              | 2.03 +/- 0.0038                                                        |         | 1.22 +/- 0.0015                |         |
| <i>R<sub>g</sub></i> (Å)                      | 26.94 +/- 0.08                                                         |         | 23.94 +/- 0.04                 |         |
| P( <i>r</i> ) analysis                        |                                                                        |         |                                |         |
| <i>I</i> (0) (cm <sup>-1</sup> )              | 2.03                                                                   |         | 1.22                           |         |
| <i>R<sub>g</sub></i> (Å)                      | 26.94                                                                  |         | 23.94                          |         |
| Porod volume (Å <sup>3</sup> )                | 93,046                                                                 |         | 52,323                         |         |
| <i>M</i> from Porod volume (kDa)              | 54,732                                                                 |         | 30,778                         |         |
| <i>M</i> from Q <sub>p</sub> (kDa)            | 67,917                                                                 |         | 38,192                         |         |
| <i>M</i> from MoW (kDa)                       | 72,517                                                                 |         | 41,979                         |         |
| <i>M</i> from V <sub>c</sub> (kDa)            | 59,567                                                                 |         | 35,210                         |         |
| <i>M</i> from Size/Shape (kDa)                | 61,444                                                                 |         | 36,614                         |         |
| <i>M</i> from Bayesian Inference (kDa)        | 62,350                                                                 |         | 36,900                         |         |
| <b>Atomistic Modelling</b>                    |                                                                        |         |                                |         |
| Symmetry                                      | P1                                                                     |         | P1                             |         |
| CRY SOL analysis - dimer (6M03)               |                                                                        |         |                                |         |
| <i>q</i> range for fitting (Å <sup>-1</sup> ) | 0.0124-0.604                                                           |         | 0.0124-0.604                   |         |
| χ <sup>2</sup>                                | 2.158                                                                  |         | 801.893                        |         |
| Predicted <i>R<sub>g</sub></i> (Å)            | 26.02                                                                  |         | 25.44                          |         |
| Vol (Å <sup>3</sup> )                         | 90,392                                                                 |         | 90,392                         |         |
| Ra (Å)                                        | 1.8                                                                    |         | 1.8                            |         |
| Dro (e Å <sup>-3</sup> )                      | 0                                                                      |         | 0                              |         |
| CRY SOL analysis - monomer (6M03)             |                                                                        |         |                                |         |
| <i>q</i> range for fitting (Å <sup>-1</sup> ) | 0.0124-0.604                                                           |         | 0.0124-0.604                   |         |
| χ <sup>2</sup>                                | 479.318                                                                |         | 64.608                         |         |
| χ <sup>2</sup> SREFLEX                        |                                                                        |         | 15.959                         |         |
| Predicted <i>R<sub>g</sub></i> (Å)            | 24.03                                                                  |         | 23.47                          |         |
| Vol (Å <sup>3</sup> )                         | 45,189                                                                 |         | 40,355                         |         |
| Ra (Å)                                        | 1.4                                                                    |         | 1.4                            |         |
| Dro (e Å <sup>-3</sup> )                      | 0.075                                                                  |         | 0.075                          |         |

---

**Supplementary Table 3: Optimized M<sup>pro</sup> gene and primer sequences used in this study.**

---

**Optimized gene sequence including N-terminal AVLQ and C-terminal GPHHHH** GCAGTCCTGCAATCTGGCTTTCGTAAGATGGCCTTCCCATCAGGTAAAAGTTGAGGGATGCATGGTGCAG GTTACATGCGGCACTACGACGCTTAACGGCCTGTGGCTCGACGATGTGGTTTATTGCCACGTCATGTG ATTTGCACTTCTGAAGACATGCTGAACCCAAATTATGAAGATTTACTGATTTCGAAAAGTAATCATAAT TTTCTGGTACAGGCGGGGAACGTTCAACTGCGCGTCATCGGGCACTCTATGCAGAATTGCGTCTGAAG CTGAAAGTTGATACTGCGAACCCAAAAACACCAAAATATAAGTTTGTGCGCATTC AACCCGGGCCAAACT TTCAGTGTTTTGGCTTGTATAACGGCAGTCCGTCGGGTGTATATCAGTGCGCAATGCGTCCCTAATTTTC ACGATTAAGGGGTCTTTTCTCAATGGGTCTGTGGTTCCGTTGGTTTTAATATTGACTATGATTGCGGTG TCATTCTGCTATATGCACCATATGGAGTTACCGACCCGGAGTGCATGCCGGCACGGATCTGGAGGGCAAT TTTTATGGCCCTTTTGTAGATCGTCAGACCCGCAAGCCGCTGGTACGGATACCACCATCACCGTGAAT GTTTTAGCGTGGCTGTACGCAGCGGTGATCAACGGCGACCGTTGGTTTTTGAATCGCTTTACTACAACG TTAAACGATTTCAACCTCGTTGCCATGAAGTACAATTATGAACCCCTCACTCAGGATCACGTCGACATC CTGGGTCCACTGTTCGGCGCAGACAGGGATTGCCGTCTGGATATGTGTGCGTCACTGAAAAGAACTGTTG CAAAACGGGATGAACGGCCGTACAATCCTGGGTAGTGCGCTGCTGGAGGATGAGTTTACGCCGTTTCGAC GTGGTCCGGCAATGTAGTGGCGTGACCTTCCAAGGTCCACATCATCACCATCATCAT

**Primer sequences** **Primers for restriction-free cloning into pGEX-6P-1**  
Fwd - CTGTTCCAGGGGCCCTGGGATCCGCAGTCCCTGCAATCTGGCTTTCGTAAGATGGCCTTC  
Rev - GACCTTCCAAGGTCCACATCATCACCATCATCATTAAGAATTCCCGGGTCGACTCGAGC

**Primers for C145A mutation**

Fwd - CGATTAAGGGGTCTTTTCTCAATGGGTCCGCTGGTTCCGTTGGTTTTAATATTGACTATG  
Rev - CATAGTCAATATTA AAAACCAACGGAACCAGCGGACCATTGAGAAAAGACCCCTTAATCG

---

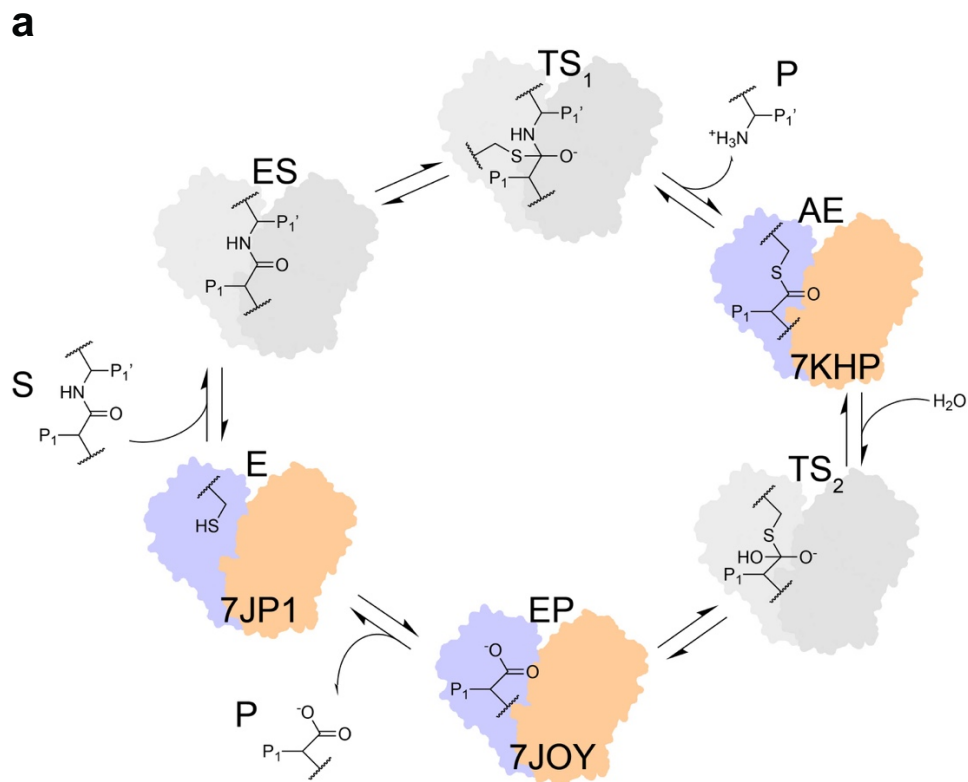

**b**

**SARS-CoV-2**

| P4     | P2      | P3' |                                         |
|--------|---------|-----|-----------------------------------------|
| TSAVLQ | SGFRKM  |     | (N-terminal auto-cleavage, nsp4   nsp5) |
| SGVTFQ | SAVKRT  |     | (C-terminal auto-cleavage, nsp5   nsp6) |
| KVATVQ | SKMSDV  |     | (nsp6   nsp7)                           |
| NRATLQ | AIASEF  |     | (nsp7   nsp8)                           |
| SAVKLQ | NNELSP  |     | (nsp8   nsp9)                           |
| ATVRLQ | AGNATE  |     | (nsp9   nsp10)                          |
| REPMLQ | SADAQS  |     | (nsp10   nsp11, nsp10, nsp12)           |
| PHTVLQ | AVGACV  |     | (nsp12   nsp13)                         |
| NVATLQ | AENVTVG |     | (nsp13   nsp14)                         |
| TFTRLQ | SLENVA  |     | (nsp14   nsp15)                         |
| FYPKLQ | SSQAWQ  |     | (nsp15   nsp16)                         |

  

**SARS-CoV-1**

| P4     | P2      | P3' |                                         |
|--------|---------|-----|-----------------------------------------|
| TSAVLQ | SGFRKM  |     | (N-terminal auto-cleavage, nsp4   nsp5) |
| SGVTFQ | GKFKKI  |     | (C-terminal auto-cleavage, nsp5   nsp6) |
| KVATVQ | SKMSDV  |     | (nsp6   nsp7)                           |
| NRATLQ | AIASEF  |     | (nsp7   nsp8)                           |
| SAVKLQ | NNELSP  |     | (nsp8   nsp9)                           |
| ATVRLQ | AGNATE  |     | (nsp9   nsp10)                          |
| REPLMQ | SADAST  |     | (nsp10   nsp11, nsp10, nsp12)           |
| PHTVLQ | AVGACV  |     | (nsp12   nsp13)                         |
| NVATLQ | AENVTVG |     | (nsp13   nsp14)                         |
| TFTRLQ | SLENVA  |     | (nsp14   nsp15)                         |
| FYPKLQ | ASQAWQ  |     | (nsp15   nsp16)                         |

**Supplementary Fig. 1: M<sup>pro</sup> reaction schematic and cleavage site specificity.** **a** Reaction schematic for M<sup>pro</sup> catalyzed proteolytic cleavage. S – substrate, E – enzyme, TS – transition state, AE – acyl-enzyme, P – product. Structures captured here shown in color with associated PDB IDs. **b** M<sup>pro</sup> cleavage site specificity sequences (P6-P6'). SARS-CoV-1 UniProt accession number P0C6X7, SARS-CoV-2 P0DTD1. A vertical line depicts the cleavage site.

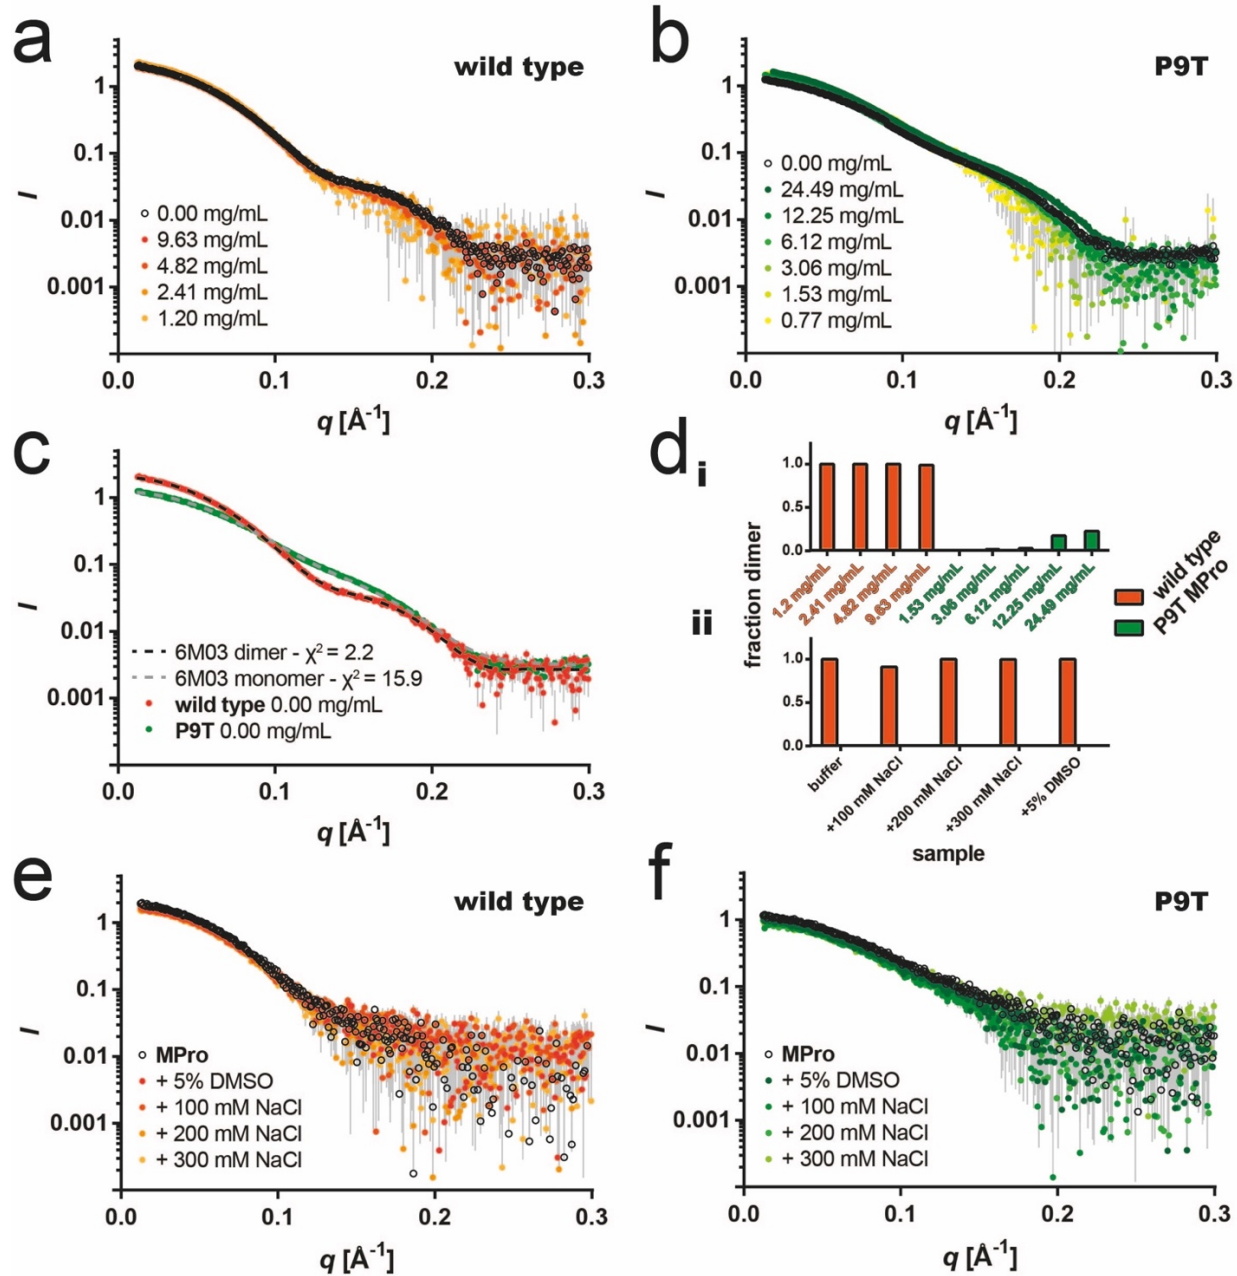

**Supplementary Fig. 2: Biological Small-Angle X-ray Scattering (BioSAXS) analysis of wild-type and P9T mutant M<sup>Pro</sup>.** **a** BioSAXS data for wildtype M<sup>Pro</sup> at various concentrations and an extrapolated 0.00 mg/mL curve. **b** BioSAXS data for P9T M<sup>Pro</sup> at various concentrations and an extrapolated 0.00 mg/mL curve. **c** CRYSOLOG fitting of PDB dimeric and monomeric M<sup>Pro</sup> structures (PDB 6M03) to the 0.00 mg/mL extrapolated data. SREFLEX was used to remove potential dimer bias from the M<sup>Pro</sup> and allow for more flexible fitting in the case of the monomer-P9T fitting. **d** Oligomer volume fraction analysis of wild type and P9T M<sup>Pro</sup> using the extrapolated 0.00 mg/mL curves as basis for dimeric (wild-type) and monomeric (P9T) M<sup>Pro</sup>. Fraction analysis of M<sup>Pro</sup> from **a** and **b**. **(i)** and analysis of 1 mg/mL M<sup>Pro</sup> with the addition of 5% DMSO and increasing NaCl up to 300 mM **(ii)**. **e,f** BioSAXS data used in **d ii**.

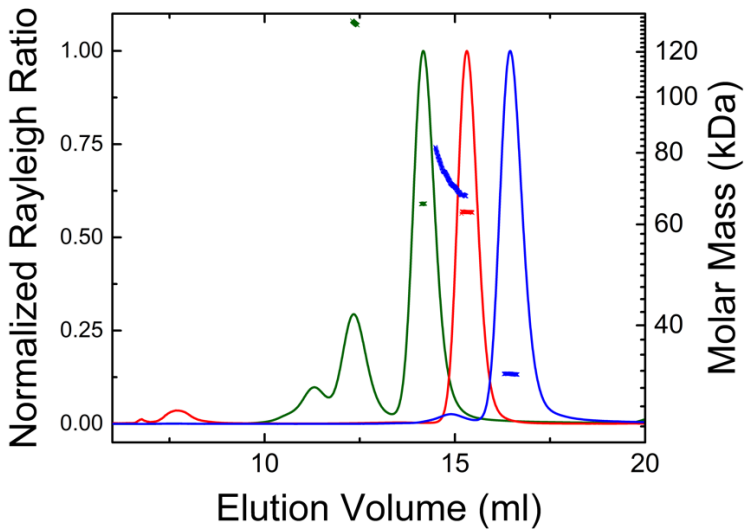

| Protein               | Peak | Vol <sub>elut</sub> (ml) | Molar Mass (kDa) | Mass Fraction (%) |
|-----------------------|------|--------------------------|------------------|-------------------|
| BSA                   | 1    | 14.1                     | 65.2             | 81.6              |
|                       | 2    | 12.4                     | 134              | 15.4              |
|                       | 3    | 11.3                     | 253.9            | 3.0               |
| wt-M <sup>pro</sup>   | 1    | 15.3                     | 63.1             | 100.0             |
| M <sup>pro</sup> -P9T | 1    | 16.4                     | 32.9             | 97.7              |
|                       | 2    | 14.9                     | 71.6             | 2.3               |

**Supplementary Fig. 3: Size-Exclusion Chromatography Multi-Angle Light Scattering (SEC-MALS) analysis of wild-type and P9T mutant M<sup>pro</sup>.** Size exclusion chromatography elution profiles with overlaid calculated molar mass for elution peaks shown in respective colors as in table. Wild-type M<sup>pro</sup> (red) elutes as a single peak with a calculated molecular mass consistent with a dimer. The P9T mutant elutes with a predominant monomeric peak with some evidence of a minor dimer species (blue). BSA (green) run for calibration and shown for comparison.

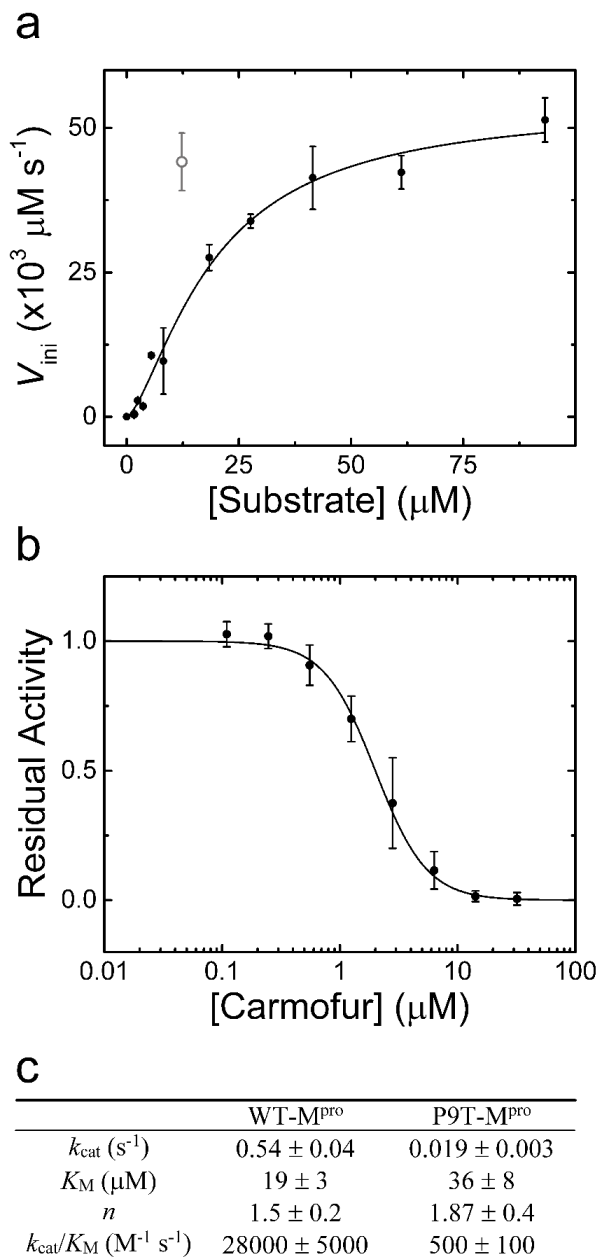

**Supplementary Fig. 4: Proteolytic activity of wild-type and P9T mutant of SARS-CoV-2 M<sup>pro</sup>.** **a** Activity of wild-type SARS-CoV-2 M<sup>pro</sup> (100 nM enzyme) shown as a plot of initial velocity versus substrate concentration, using the substrate: (MCA)-AVLQ/SGFR-Lys(Dnp)-Lys-NH<sub>2</sub>. The datum represented in grey as a hollow circle was omitted for the non-linear regression analysis of the data to derive enzymology parameters but is shown here for completeness. Data are presented as mean values ± SD calculated from at least three data points. **b** Dose dependent inhibition of SARS-CoV-2 M<sup>pro</sup> activity by the antineoplastic agent carmofur (IC<sub>50</sub> = 1.8 ± 0.3 μM,  $n = 2.0 ± 0.1$ ). Assay conducted at 27 °C in 50 mM Tris buffer, 2 mM EDTA pH 7.3, 10 % DMSO with 20 μM substrate and 100 nM M<sup>pro</sup>. Data are presented as mean values ± SD calculated from at least three data points. **c** Enzymatic parameters for the wild-type SARS-CoV-2 M<sup>pro</sup> and the P9T M<sup>pro</sup> mutant.  $n$  = the Hill coefficient.



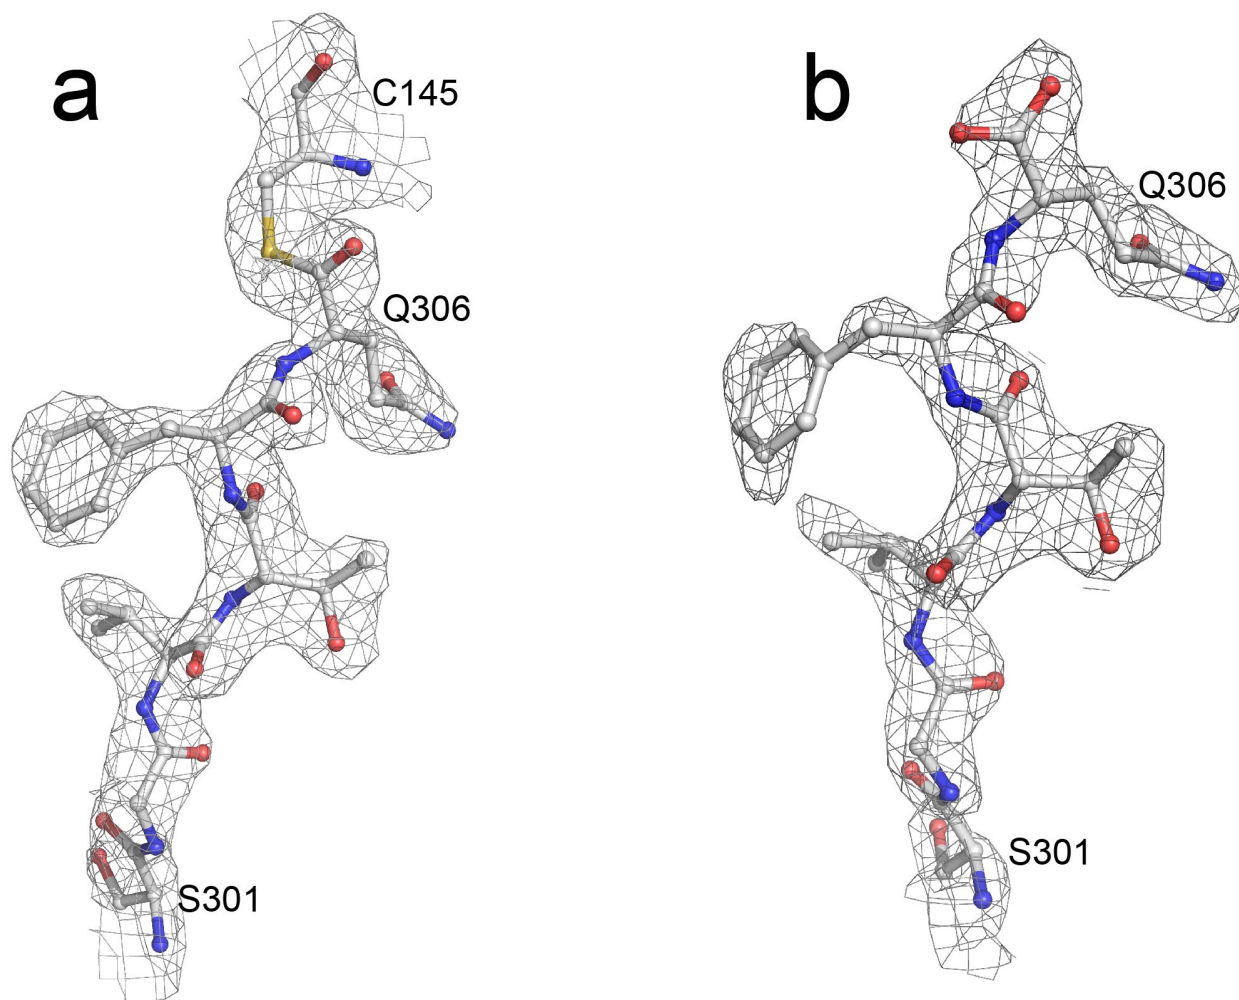

**Supplementary Fig. 5: Simulated annealing 2mFo-DFc OMIT electron density maps for the active site of M<sup>pro</sup> acyl-enzyme complex and product complex. **a** Simulated annealing 2mFo - DFc OMIT maps calculated in absence of C-terminal Ser301-Gln306 autocleavage sequence bound in active site of chain B for the M<sup>pro</sup> acyl-enzyme complex. **b** As **a** for the M<sup>pro</sup> C145A product complex. Map contoured at 1  $\sigma$  with a 2 Å carve around the omitted atoms.**

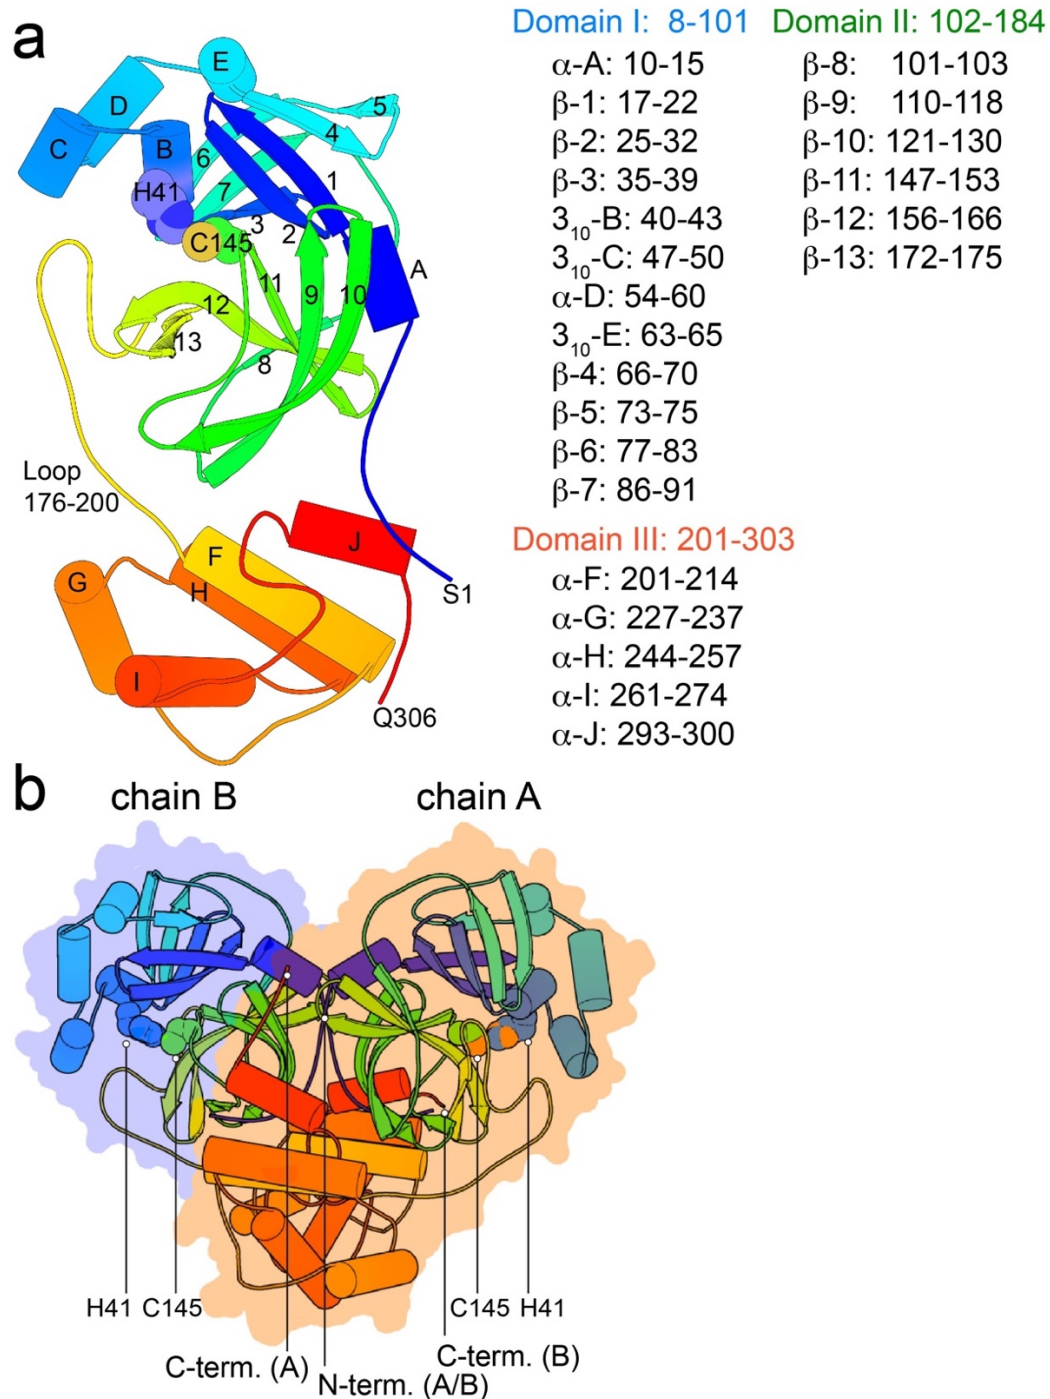

**Supplementary Fig. 6: The secondary structure and dimeric structure of SARS-CoV-2 M<sup>pro</sup>.** **a** A cartoon drawing showing the secondary structural elements with helices as cylinders and  $\beta$ -strands as arrows. The protomer is colored spectrally from N-terminus (blue) to C-terminus (red). The amino acid residue range for domains (I-III) and the secondary structural elements are listed. **b** M<sup>pro</sup> dimer. Each protomer is shown in cartoon and colored spectrally (N-terminus blue to C-terminus red). A transparent molecular surface is shown around each protomer (chain A – orange, chain B- blue).

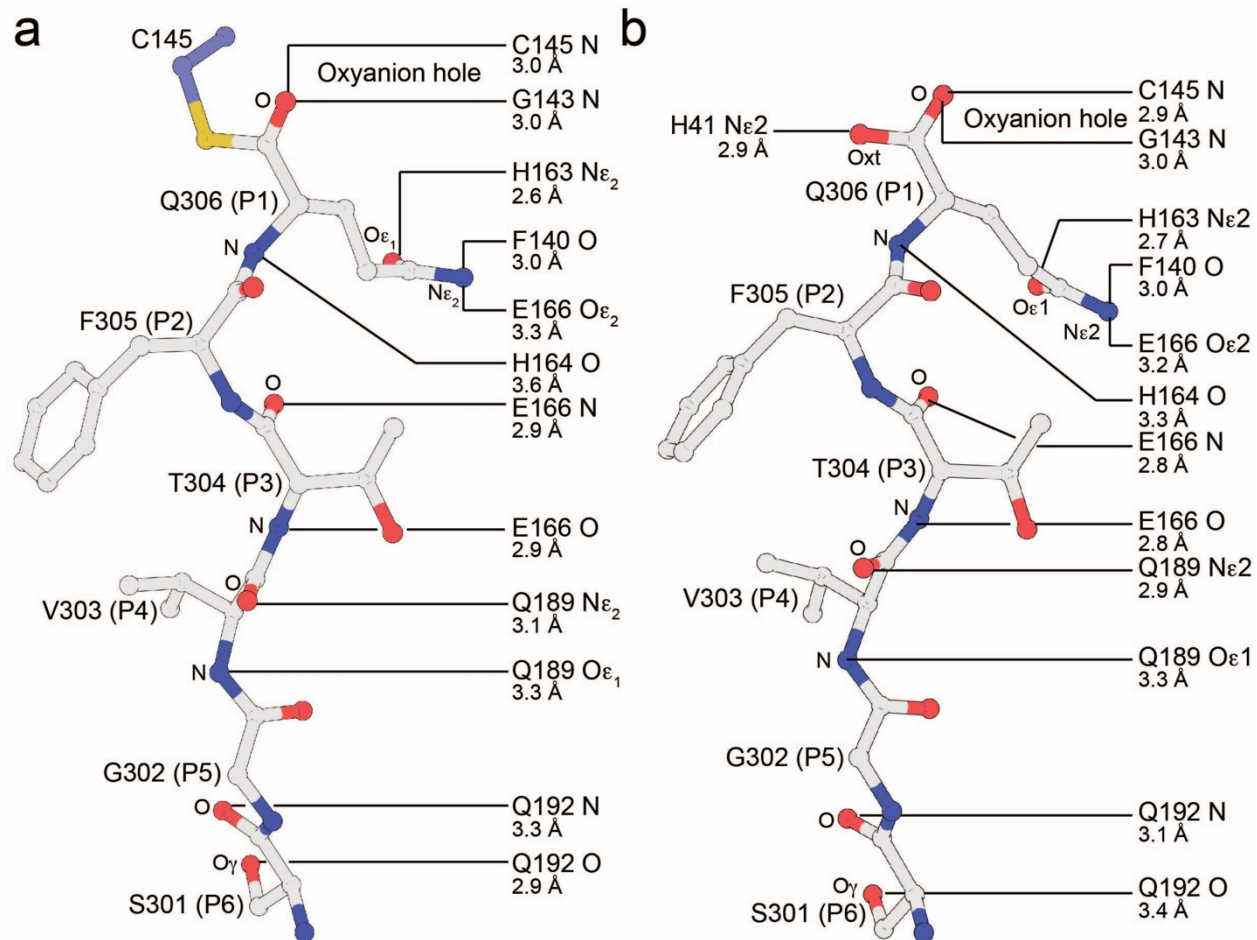

**Supplementary Fig. 7: The hydrogen bonding distances observed between the C-terminus substrate of chain B' and the catalytic groove of chain B for the acyl-enzyme (a) and product (b) complexes.**

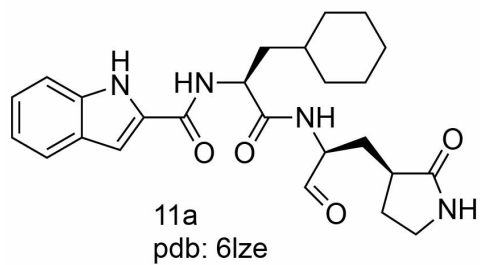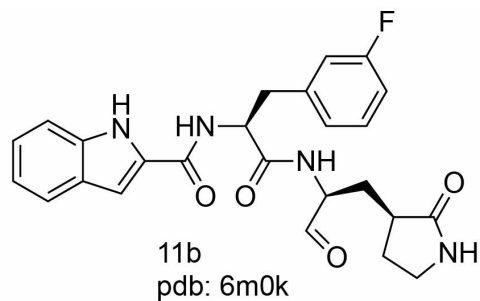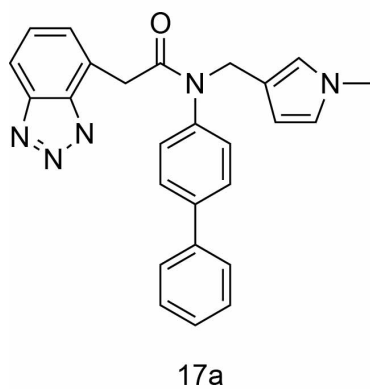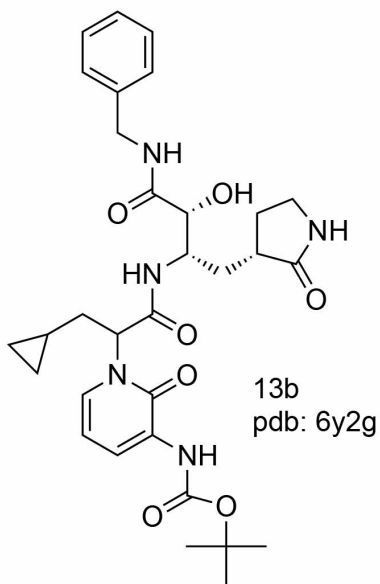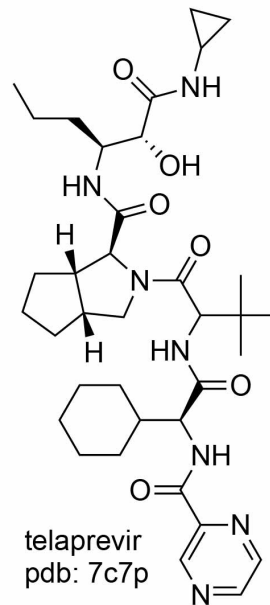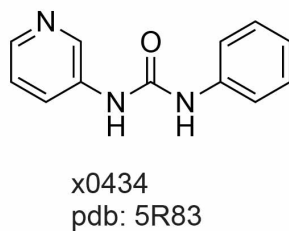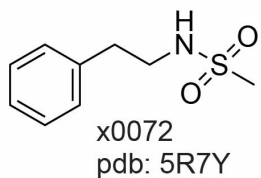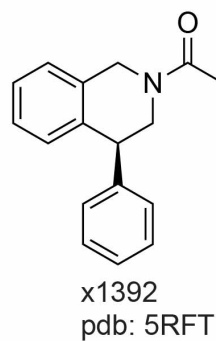

Supplementary Fig. 8: Chemical structures of the M<sup>pro</sup> inhibitors depicted in Fig. 5.
